# Supplementary material
Source: Frontiers journal article supplement (https://www.frontiersin.org/articles/237036)
Supplement: Image_3.PDF [file Image_3.PDF]

## SUPPLEMENTARY FIGURE 3

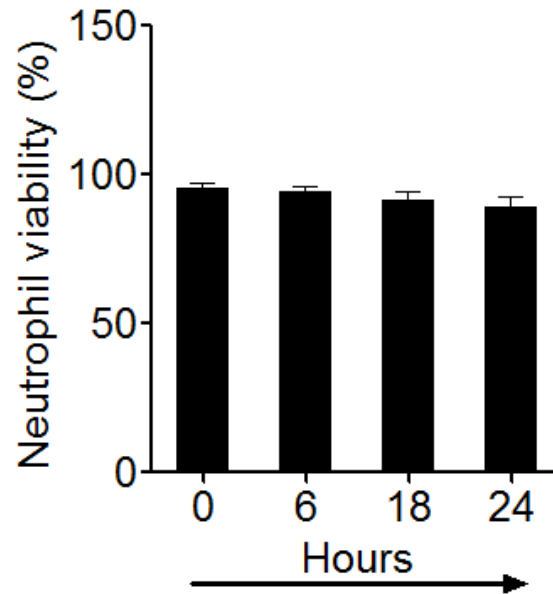

**Supplementary Figure 3 Viability of neutrophils.** Neutrophils viability was checked at different time point to find out whether they would survive throughout the incubation period in neutrophils and HepG2/HepG2.2.15 co-culture. Result showed that 90% neutrophils survived till 24 hrs.
